# Supplementary material for: FT-ICR/MS and GC-EI/MS Metabolomics Networking Unravels Global Potato Sprout's Responses to Rhizoctonia solani Infection
Source: PubMed Central journal article supplement (PMC3411821; doi:10.1371/journal.pone.0042576), 2012-08-03
Supplement: pone.0042576.s005.pdf [file pone.0042576.s005.pdf]

**Table S1.** Changes in potato sprouts' metabolome in response to *Rhizoctonia solani* 72 h post infection. Metabolites with the largest variation in their relative content between control and infected sprouts and essential components of plant defence are displayed. Compound identification (ID) is provided according to the PubChem database (<http://pubchem.ncbi.nlm.nih.gov/>).

| Metabolites                    | Relative content<br>change in infected<br>sprouts (%) <sup>a</sup> | Relative content<br>of infected sprouts<br>(%) <sup>a</sup> | Analytical<br>platform <sup>b</sup> | Molecular<br>form                                | Monoisotopic mass<br>(Da) | P-values   | ID                                               |
|--------------------------------|--------------------------------------------------------------------|-------------------------------------------------------------|-------------------------------------|--------------------------------------------------|---------------------------|------------|--------------------------------------------------|
| <i>Alkaloids</i>               |                                                                    |                                                             |                                     |                                                  |                           |            |                                                  |
| <i>Sesquiterpene alkaloids</i> |                                                                    |                                                             |                                     |                                                  |                           |            |                                                  |
| Phytuberin                     | <i>n/a</i> <sup>c</sup>                                            | 0.20                                                        | FT+                                 | C <sub>17</sub> H <sub>26</sub> O <sub>4</sub>   | 294.1831                  | <i>n/a</i> | 10379702, 315114                                 |
| Rishitin                       | <i>n/a</i> <sup>c</sup>                                            | 0.16                                                        | FT+                                 | C <sub>14</sub> H <sub>22</sub> O <sub>2</sub>   | 222.1619                  | <i>n/a</i> | 108064, 534260                                   |
| Solavetivone                   | <i>n/a</i> <sup>c</sup>                                            | 1.52                                                        | FT-                                 | C <sub>15</sub> H <sub>22</sub> O                | 218.1671                  | <i>n/a</i> | 10104810, 442399,<br>521550, 185777,<br>11085279 |
| <i>Steroid alkaloids</i>       |                                                                    |                                                             |                                     |                                                  |                           |            |                                                  |
| $\alpha$ -Chaconine            | -36.82                                                             | 4.78                                                        | FT+                                 | C <sub>45</sub> H <sub>73</sub> NO <sub>14</sub> | 851.5031                  | <0.0001    | 104750, 442971                                   |
| $\alpha$ -Solanine             | -27.81                                                             | 2.02                                                        | FT+                                 | C <sub>45</sub> H <sub>73</sub> NO <sub>15</sub> | 867.4980                  | 0.0022     | 30185, 51020424,<br>9549171, 262500,<br>6537493  |
| $\beta$ -Chaconine             | 88.91                                                              | 0.95                                                        | FT+                                 | C <sub>39</sub> H <sub>63</sub> NO <sub>10</sub> | 705.4452                  | <0.0001    | 119393                                           |
| $\beta$ -Solanine              | <i>n/a</i> <sup>c</sup>                                            | 0.33                                                        | FT+                                 | C <sub>39</sub> H <sub>63</sub> NO <sub>11</sub> | 721.4401                  | <i>n/a</i> | 45479590                                         |

|                                         |                         |       |     |                                                              |          |            |                                                                   |
|-----------------------------------------|-------------------------|-------|-----|--------------------------------------------------------------|----------|------------|-------------------------------------------------------------------|
| $\gamma$ -Chaconine/ $\gamma$ -Solanine | 57.07                   | 7.64  | FT+ | C <sub>33</sub> H <sub>53</sub> NO <sub>6</sub>              | 559.3873 | <0.0001    | 160496/25245074                                                   |
| Solanaviol                              | <i>n/a</i> <sup>c</sup> | 0.30  | FT+ | C <sub>27</sub> H <sub>43</sub> NO <sub>3</sub>              | 429.3243 | <i>n/a</i> | -                                                                 |
| Solanidine                              | 53.86                   | 30.59 | FT+ | C <sub>27</sub> H <sub>43</sub> NO                           | 397.3345 |            | 65727                                                             |
| Solasodenone                            | <i>n/a</i> <sup>c</sup> | 0.65  | FT+ | C <sub>27</sub> H <sub>41</sub> NO <sub>2</sub>              | 411.3137 | <i>n/a</i> | 331777                                                            |
| Solasodiene                             | <i>n/a</i> <sup>c</sup> | 1.17  | FT+ | C <sub>27</sub> H <sub>41</sub> NO                           | 395.3188 | <i>n/a</i> | 495009                                                            |
| Solasodine                              | 88.81                   | 3.89  | FT+ | C <sub>27</sub> H <sub>43</sub> NO <sub>2</sub>              | 413.3294 | <0.0001    | 5250, 31342, 442985,<br>5200420, 44584207,<br>6432036, 5701987    |
| Solasonine                              | <i>n/a</i> <sup>c</sup> | 0.06  | FT+ | C <sub>45</sub> H <sub>73</sub> NO <sub>16</sub>             | 883.4929 | <i>n/a</i> | 73410, 119247,<br>255983, 537159,<br>9876101, 9942086,<br>6326050 |
| Solaspinalidine                         | <i>n/a</i> <sup>c</sup> | 0.11  | FT+ | C <sub>27</sub> H <sub>41</sub> NO <sub>3</sub>              | 427.3086 | <i>n/a</i> | -                                                                 |
| <i>Nortropane alkaloids</i>             |                         |       |     |                                                              |          |            |                                                                   |
| Calystegine A3                          | -49.34                  | 0.05  | FT+ | C <sub>7</sub> H <sub>13</sub> NO <sub>3</sub>               | 159.0895 | <0.0001    | 442999, 183073,<br>45109777                                       |
| Calystegine B2                          | -23.45                  | 0.05  | FT+ | C <sub>7</sub> H <sub>13</sub> NO <sub>4</sub>               | 175.0845 | 0.0009     | 124434, 443000                                                    |
| <i>Amino acids</i>                      |                         |       |     |                                                              |          |            |                                                                   |
| <i>Protein amino acids</i>              |                         |       |     |                                                              |          |            |                                                                   |
| 5-Oxo-L-proline                         | 40.18                   | 1.07  | GC  | C <sub>5</sub> H <sub>7</sub> NO <sub>3</sub>                | 129.0426 | 0.043      | 7405                                                              |
| (Pyroglutamic acid)                     |                         |       |     |                                                              |          |            |                                                                   |
| <i>L</i> -asparagine <sup>d</sup>       | -32.32                  | 3.21  | GC  | C <sub>4</sub> H <sub>8</sub> N <sub>2</sub> O <sub>3</sub>  | 132.0535 | <0.0001    | 6267                                                              |
| <i>L</i> -glutamine <sup>d</sup>        | -57.23                  | 0.62  | GC  | C <sub>5</sub> H <sub>10</sub> N <sub>2</sub> O <sub>3</sub> | 146.0691 | 0.0005     | 5961                                                              |
| <i>L</i> -histidine                     | -89.74                  | 0.09  | FT- | C <sub>6</sub> H <sub>9</sub> N <sub>3</sub> O <sub>2</sub>  | 155.0695 | <0.0001    | 6274                                                              |

|                                          |        |      |     |                                                               |          |         |             |
|------------------------------------------|--------|------|-----|---------------------------------------------------------------|----------|---------|-------------|
| <i>L</i> -isoleucine <sup>d</sup>        | -43.52 | 0.46 | GC  | C <sub>6</sub> H <sub>13</sub> NO <sub>2</sub>                | 131.0946 | <0.0001 | 6306        |
| <i>L</i> -leucine <sup>d</sup>           | -59.25 | 0.15 | GC  | C <sub>6</sub> H <sub>13</sub> NO <sub>2</sub>                | 131.0946 | <0.0001 | 6106        |
| <i>L</i> -proline <sup>d</sup>           | -42.87 | 6.53 | GC  | C <sub>5</sub> H <sub>9</sub> NO <sub>2</sub>                 | 115.0633 | <0.0001 | 145742      |
|                                          | -79.17 | 0.18 | FT+ |                                                               |          | 0.0118  |             |
| <i>L</i> -serine <sup>d</sup>            | -34.43 | 0.68 | GC  | C <sub>3</sub> H <sub>7</sub> NO <sub>3</sub>                 | 105.0426 | <0.0001 | 5951        |
| <i>L</i> -threonine <sup>d</sup>         | -48.43 | 0.58 | GC  | C <sub>4</sub> H <sub>9</sub> NO <sub>3</sub>                 | 119.0582 | <0.0001 | 6288        |
| <i>L</i> -valine                         | -68.56 | 0.07 | FT+ | C <sub>5</sub> H <sub>11</sub> NO <sub>2</sub>                | 117.0790 | <0.0001 | 6287        |
|                                          | -15.80 | 1.92 | GC  |                                                               |          | 0.0154  |             |
| <i>Nonprotein amino acids</i>            |        |      |     |                                                               |          |         |             |
| $\beta$ -Alanine <sup>d</sup>            | 20.05  | 0.05 | GC  | C <sub>3</sub> H <sub>7</sub> NO <sub>2</sub>                 | 89.0477  | 0.0246  | 239         |
| 4-aminobutanoic acid (GABA) <sup>d</sup> | 20.87  | 3.67 | GC  | C <sub>4</sub> H <sub>9</sub> NO <sub>2</sub>                 | 103.0633 | 0.0205  | 119         |
| Piperidine-2-carboxylic acid             | 33.18  | 0.02 | GC  | C <sub>6</sub> H <sub>11</sub> NO <sub>2</sub>                | 129.0789 | 0.0058  | 849, 439227 |
| (Pipelic acid)                           |        |      |     |                                                               |          |         |             |
| <i>CARBOHYDRATES</i>                     |        |      |     |                                                               |          |         |             |
| <i>D</i> -Fructose <sup>d</sup>          | -28.01 | 6.41 | GC  | C <sub>6</sub> H <sub>12</sub> O <sub>6</sub>                 | 180.0634 | 0.0216  | 5984        |
| Myo-inositol <sup>d</sup>                | -22.47 | 4.40 | GC  | C <sub>6</sub> H <sub>12</sub> O <sub>6</sub>                 | 180.0634 | 0.0050  | 892         |
| <i>Carboxylic acids and</i>              |        |      |     |                                                               |          |         |             |
| <i>phenolics</i>                         |        |      |     |                                                               |          |         |             |
| 2-Hydroxybutanedioic acid                | -71.13 | 0.10 | FT- | C <sub>4</sub> H <sub>6</sub> O <sub>5</sub>                  | 134.0215 | 0.0039  | 222656      |
| (Malic acid)                             |        |      |     |                                                               |          |         |             |
|                                          | -21.52 | 6.64 | GC  |                                                               |          | <0.0001 |             |
| 2-Hydroxyundecanoic acid                 | -62.67 | 0.36 | GC  | C <sub>11</sub> H <sub>22</sub> O <sub>3</sub>                | 202.1569 |         | 5282899     |
| 2-Thiobarbituric acid                    | 20.9   | 5.96 | GC  | C <sub>4</sub> H <sub>4</sub> N <sub>2</sub> O <sub>2</sub> S | 143.9993 | 0.0490  | 2723628     |
| Citramalic acid                          | 92.75  | 0.25 | FT- | C <sub>5</sub> H <sub>8</sub> O <sub>5</sub>                  | 148.0372 | <0.0001 | 1081        |
| Chlorogenic acid                         | -95.03 | 0.01 | FT- | C <sub>16</sub> H <sub>18</sub> O <sub>9</sub>                | 354.0950 | <0.0001 | 1794427     |
| <i>D</i> -galacturonic acid              | -21.58 | 0.06 | GC  | C <sub>6</sub> H <sub>10</sub> O <sub>7</sub>                 | 194.0427 | 0.0356  | 3627        |
| <i>D</i> -gluconic acid                  | 56.35  | 2.69 | GC  | C <sub>6</sub> H <sub>12</sub> O <sub>7</sub>                 | 196.0583 | 0.0209  | 10690       |

|                                                              |        |       |     |                                                               |          |         |                                                                      |
|--------------------------------------------------------------|--------|-------|-----|---------------------------------------------------------------|----------|---------|----------------------------------------------------------------------|
| <i>D</i> -glucuronic acid                                    | -41.46 | 0.02  | GC  | C <sub>6</sub> H <sub>10</sub> O <sub>7</sub>                 | 194.0427 | 0.0039  | 444791                                                               |
| Ferulic acid                                                 | 22.34  | 0.41  | FT- | C <sub>10</sub> H <sub>10</sub> O <sub>4</sub>                | 194.0579 | 0.0437  | 445858, 1548883                                                      |
| <i>N</i> -feruloylputrescine                                 | -7.59  | 3.36  | FT+ | C <sub>14</sub> H <sub>20</sub> N <sub>2</sub> O <sub>3</sub> | 264.1473 | 0.0487  | 5281796                                                              |
| <i>N</i> -feruloyltyramine                                   | 48.08  | 0.09  | FT+ | C <sub>18</sub> H <sub>19</sub> NO <sub>4</sub>               | 313.1314 | 0.0172  | 5280537                                                              |
| Nonanedioic acid <sup>d</sup> (Azelaic acid)                 | 41.55  | 0.08  | GC  | C <sub>9</sub> H <sub>16</sub> O <sub>4</sub>                 | 188.1049 | 0.0009  | 2266                                                                 |
|                                                              | 24.36  | 0.02  | FT- |                                                               |          | 0.0451  |                                                                      |
| Pentanedioic acid (Glutaric acid)                            | -14.56 | 0.16  | FT- | C <sub>5</sub> H <sub>8</sub> O <sub>4</sub>                  | 132.0423 | 0.0205  | 743                                                                  |
|                                                              | -49.39 | 1.24  | GC  |                                                               |          | <0.0001 |                                                                      |
| Succinic acid <sup>d</sup>                                   | 65.36  | 1.54  | GC  | C <sub>4</sub> H <sub>6</sub> O <sub>4</sub>                  | 118.0266 | <0.0001 | 1110                                                                 |
| <i>Fatty acids and peroxides</i>                             |        |       |     |                                                               |          |         |                                                                      |
| ( <i>Z</i> )-Octadec-9-enoic acid (Oleate)                   | -24.61 | 7.61  | FT- | C <sub>18</sub> H <sub>34</sub> O <sub>2</sub>                | 282.2558 | 0.0487  | 445639                                                               |
|                                                              | -31.40 | 0.06  | GC  |                                                               |          | 0.0057  |                                                                      |
| Colneleic acid                                               | 84.79  | 4.26  | FT- | C <sub>18</sub> H <sub>30</sub> O <sub>3</sub>                | 294.2194 | 0.0012  | 6441681                                                              |
| Colnelenic acid                                              | 20.68  | 1.51  | FT- | C <sub>18</sub> H <sub>28</sub> O <sub>3</sub>                | 292.2038 | 0.0457  | 6441679                                                              |
| Hydroperoxyoctadecatrienoic acid (Hydroperoxylinolenic acid) | -51.54 | 1.16  | FT- | C <sub>18</sub> H <sub>30</sub> O <sub>4</sub>                | 310.2144 | 0.0378  | 5497123, 6440263, 5282866                                            |
| Hydroxyoctadecadienoic acid (Hydroxylinoleic acid)           | 26.93  | 0.09  | FT+ | C <sub>18</sub> H <sub>32</sub> O <sub>3</sub>                | 296.2351 | 0.0346  | 5282948, 6443013, 5282945, 5312833 5281117, 5312830 6433819, 6440705 |
|                                                              | 70.96  | 6.23  | FT- |                                                               |          |         |                                                                      |
| Octadecadienoic acid (Linolate)                              | 44.34  | 18.84 | FT- | C <sub>18</sub> H <sub>32</sub> O <sub>2</sub>                | 280.2402 | 0.0001  | 5280450                                                              |
|                                                              | 26.32  | 0.30  | GC  |                                                               |          | 0.0167  |                                                                      |
| Trihydroxyoctadecanoic acid (Trihydroxystearic acid)         | -49.03 | 1.21  | FT- | C <sub>18</sub> H <sub>36</sub> O <sub>5</sub>                | 332.2563 | 0.0015  | 147011                                                               |
| <i>Several groups</i>                                        |        |       |     |                                                               |          |         |                                                                      |
| $\alpha$ -Tocotrienol                                        | 58.95  | 2.39  | FT- | C <sub>29</sub> H <sub>44</sub> O <sub>2</sub>                | 424.3341 | 0.0300  | 5282347, 92161, 11464420                                             |
| 7H-Purin-6-amine (Adenine)                                   | 69.82  | 1.01  | GC  | C <sub>5</sub> H <sub>5</sub> N <sub>5</sub>                  | 135.0545 | 0.0015  | 190                                                                  |

|                                |        |      |     |                                                 |          |         |      |
|--------------------------------|--------|------|-----|-------------------------------------------------|----------|---------|------|
|                                | 42.88  | 0.12 | FT- |                                                 |          | <0.0001 |      |
| 4-(1H-indol-3-yl)butanoic acid | -62.75 | 1.16 | FT+ | C <sub>12</sub> H <sub>13</sub> NO <sub>2</sub> | 203.0946 | 0.0206  | 8617 |
| (Indolebutyric acid)           |        |      |     |                                                 |          |         |      |

---

<sup>a</sup> Values refer to the relative (%) peak area or amplitude of total peak area or amplitude and represent the mean of eight biological replications

<sup>b</sup> FT+; Fourier transform-ion cyclotron resonance-mass spectrometry (FT-ICR/MS)-positive mode, FT-; FT-ICR/MS-negative mode, GC; gas chromatography MS

<sup>c</sup> not detected in controls

<sup>d</sup> Metabolites that were definitely identified based on matching their mass spectra and retention times to those of the authentic chemical standards analyzed on the same system with the same analytical method.
