# Supplementary material for: FT-ICR/MS and GC-EI/MS Metabolomics Networking Unravels Global Potato Sprout's Responses to Rhizoctonia solani Infection
Source: PubMed Central journal article supplement (PMC3411821; doi:10.1371/journal.pone.0042576), 2012-08-03
Supplement: pone.0042576.s006.pdf [file pone.0042576.s006.pdf]

**Table S2.** Identified metabolites of eight-day-old mycelia of *Rhizoctonia solani* AG3 grown on PDA that could possibly have a high leverage during the biological interpretation of metabolomics data. As a rule of thumb, significantly increased metabolites in infected plant tissues as revealed by metabolomics analyses that are also components of fungal mycelia are not biologically interpreted.

| Metabolites                                 | Molecular form                                  | Monoisotopic mass (Da) |
|---------------------------------------------|-------------------------------------------------|------------------------|
| <i>AMINO ACIDS</i>                          |                                                 |                        |
| <i>Protein amino acids</i>                  |                                                 |                        |
| <i>L</i> -alanine <sup>a</sup>              | C <sub>3</sub> H <sub>7</sub> NO <sub>2</sub>   | 89.0477                |
| <i>L</i> -proline <sup>a</sup>              | C <sub>5</sub> H <sub>9</sub> NO <sub>2</sub>   | 115.0633               |
| <i>L</i> -valine <sup>a</sup>               | C <sub>5</sub> H <sub>11</sub> NO <sub>2</sub>  | 117.0790               |
| <i>CARBOHYDRATES</i>                        |                                                 |                        |
| <i>Monosaccharides</i>                      |                                                 |                        |
| <i>D</i> -glucose <sup>a</sup>              | C <sub>6</sub> H <sub>12</sub> O <sub>6</sub>   | 180.0634               |
| <i>D</i> -fructose <sup>a</sup>             | C <sub>6</sub> H <sub>12</sub> O <sub>6</sub>   | 180.0634               |
| <i>N</i> -acetylglucosamine                 | C <sub>8</sub> H <sub>15</sub> NO <sub>6</sub>  | 221.0899               |
| <i>Polysaccharides</i>                      |                                                 |                        |
| $\alpha$ - $\alpha$ -Trehalose <sup>a</sup> | C <sub>12</sub> H <sub>22</sub> O <sub>11</sub> | 342.1162               |
| Sucrose <sup>a</sup>                        | C <sub>12</sub> H <sub>22</sub> O <sub>11</sub> | 342.1162               |
| Maltose                                     | C <sub>12</sub> H <sub>22</sub> O <sub>11</sub> | 342.1162               |
| <i>Sugar alcohols</i>                       |                                                 |                        |
| Erythritol                                  | C <sub>4</sub> H <sub>10</sub> O <sub>4</sub>   | 122.0579               |
| Glycerol <sup>a</sup>                       | C <sub>3</sub> H <sub>8</sub> O <sub>3</sub>    | 92.0473                |
| Mannitol                                    | C <sub>6</sub> H <sub>14</sub> O <sub>6</sub>   | 182.0790               |
| Myo-inositol <sup>a</sup>                   | C <sub>6</sub> H <sub>12</sub> O <sub>6</sub>   | 180.0634               |
| <i>Tetrose carbohydrates</i>                |                                                 |                        |
| Erythrose                                   | C <sub>4</sub> H <sub>8</sub> O <sub>4</sub>    | 120.0423               |

*CARBOXYLIC ACIDS*

|                            |             |          |
|----------------------------|-------------|----------|
| Lactic acid                | $C_3H_6O_3$ | 90.0316  |
| Succinic acid <sup>a</sup> | $C_4H_6O_4$ | 118.0266 |

*FATTY ACIDS*

|                                              |                   |          |
|----------------------------------------------|-------------------|----------|
| ( <i>9Z</i> )-Octadecenoic acid (Oleic acid) | $C_{18}H_{34}O_2$ | 282.2558 |
| Octadecadienoic acid (Linoleic acid)         | $C_{18}H_{32}O_2$ | 280.2402 |

---

<sup>a</sup>Metabolites that were definitely identified based on matching the mass spectra and retention times and the accurate masses of their adducts to those of the authentic chemical standards analyzed on the same system with the same analytical method.
