# Supplementary material for: FT-ICR/MS and GC-EI/MS Metabolomics Networking Unravels Global Potato Sprout's Responses to Rhizoctonia solani Infection
Source: PubMed Central journal article supplement (PMC3411821; doi:10.1371/journal.pone.0042576), 2012-08-03
Supplement: pone.0042576.s007.pdf [file pone.0042576.s007.pdf]

**Table S3.** Half maximal effective concentration (EC<sub>50</sub>) of selected antifungal potato biomarkers against *Rhizoctonia solani*.

| Metabolites                         | EC <sub>50</sub> (M)     |
|-------------------------------------|--------------------------|
| azoxystrobin (commercial fungicide) | 0.007±0.001 <sup>a</sup> |
| cinnamate                           | 0.576±0.151 <sup>b</sup> |
| fumarate                            | 7.156±0.824 <sup>c</sup> |
| oxalate                             | 5.698±1.231 <sup>c</sup> |
| $\alpha$ -solanine                  | 0.189±0.052 <sup>d</sup> |
| succinate                           | 5.351±1.051 <sup>c</sup> |

<sup>a</sup>Values represent the means of three separate experiments with three replications and standard deviation. Means followed by the same letter are not significantly different (Tukey's HSD test,  $P < 0.05$ ).
