# Supplementary material for: FT-ICR/MS and GC-EI/MS Metabolomics Networking Unravels Global Potato Sprout's Responses to Rhizoctonia solani Infection
Source: PubMed Central journal article supplement (PMC3411821; doi:10.1371/journal.pone.0042576), 2012-08-03
Supplement: pone.0042576.s008.pdf [file pone.0042576.s008.pdf]

**Table S4.** Potato sprouts' metabolites with the highest fluctuation 72 h after infection by *Rhizoctonia solani* as revealed performing metabolomics analyses.

The connections between those metabolites with enzymes catalyzing their biosynthesis and corresponding encoding genes were based on information retrieved from the databases PotatoCyc and KEGG. In cases where no hits were found in these databases, searches were performed in the PlantCyc database, and results are displayed for other plant species. Linking to the associated on-line sources is provided by clicking on the bold highlighted codes/words holding the shift button.

| Metabolite(s)                                        | Catalyzing enzyme(s)                                         | Biosynthetic pathway(s)                                                                     | Accession number                                                                                           |          | Organism <sup>a</sup> |
|------------------------------------------------------|--------------------------------------------------------------|---------------------------------------------------------------------------------------------|------------------------------------------------------------------------------------------------------------|----------|-----------------------|
|                                                      |                                                              |                                                                                             | PotatoCyc                                                                                                  | PlantCyc |                       |
| $\beta$ -alanine                                     | glutamate decarboxylase (E.C. 4.1.1.15)                      | $\beta$ -alanine metabolism [ <b>rn00410</b> ]                                              | <b>SGNU-269741</b> , <b>SGNU-274223</b> ,                                                                  |          | <i>S. tuberosum</i>   |
|                                                      |                                                              | pantothenate and CoA biosynthesis [ <b>ec00770</b> ]                                        | <b>SGNU-277090</b> , <b>SGNU-287538</b><br><b>SGNU-287539</b> , <b>SGNU-287540</b> ,<br><b>SGNU-293317</b> |          |                       |
|                                                      | aspartate 1-decarboxylase<br>(E.C. 4.1.1.11)                 |                                                                                             |                                                                                                            |          |                       |
|                                                      | aldehyde dehydrogenase (NAD <sup>+</sup> )<br>(E.C. 1.2.1.3) | $\beta$ -alanine metabolism [ <b>rn00410</b> ]                                              | <b>SGNU-270085</b>                                                                                         |          | <i>S. tuberosum</i>   |
|                                                      | aminobutyraldehyde dehydrogenase (E.C. 1.2.1.19)             |                                                                                             |                                                                                                            |          |                       |
| beta-ureidopropionase (E.C. 3.5.1.6)                 |                                                              | pyrimidine metabolism [ <b>ec00240</b> ],                                                   | <b>JGI-819740</b>                                                                                          |          | <i>P. trichocarpa</i> |
|                                                      |                                                              | $\beta$ -alanine metabolism [ <b>rn00410</b> ],                                             | <b>LOC_Os07g30170.1</b>                                                                                    |          | <i>O. sativa</i>      |
|                                                      |                                                              | pantothenate and CoA biosynthesis                                                           | <b>PYD3</b>                                                                                                |          | <i>A. thaliana</i>    |
|                                                      |                                                              | [ <b>ec00770</b> ]                                                                          | <b>TC100937</b> , <b>TC100938</b> ,<br><b>TC108524</b>                                                     |          | <i>M. truncatula</i>  |
| $\beta$ -alanine aminotransferase<br>(E.C. 2.6.1.18) |                                                              | $\beta$ -alanine metabolism [ <b>rn00410</b> ],<br>propanoate metabolism [ <b>rn00640</b> ] | <b>AT-3G08860.1</b>                                                                                        |          | <i>A. thaliana</i>    |
| N-acetyl-beta-alanine deacetylase<br>(E.C. 3.5.1.21) |                                                              | $\beta$ -alanine metabolism [ <b>rn00410</b> ]                                              |                                                                                                            |          |                       |
| aminoacyl-lysine dipeptidase<br>(E.C. 3.4.13.4)      |                                                              |                                                                                             |                                                                                                            |          |                       |

carnosine synthase (E.C. 6.3.2.11)

---

guanidinopropionase (E.C. 3.5.3.17)

---

aminoacylhistidine dipeptidase

(E.C. 3.4.13.3)

---

pantothenate amidohydrolase

pantothenate and CoA biosynthesis

(E.C. 3.5.1.22)

[**rn00770**]

---

anserinase (E.C. 3.4.13.5)

$\beta$ -alanine metabolism [**rn00410**]

---

4-aminobutanoic acid (GABA)

glutamate decarboxylase (E.C. 4.1.1.15)

alanine, aspartate and glutamate metabolism

[**rn00250**]

**SGN-U269741**, **SGN-U274223**,  
**SGN-U277090**, **SGNU-287538**,  
**SGNU-287539**, **SGNU-287540**  
**SGNU-293317**

---

*S. tuberosum*

---

aldehyde dehydrogenase (NAD+)

arginine and proline metabolism [**rn00330**]

**SGNU-270085**

*S. tuberosum*

(E.C. 1.2.1.3)

---

guanidinobutyrase (E.C. 3.5.3.7)

---

aminoacylhistidine dipeptidase

(E.C. 3.4.13.3)

---

aminobutyraldehyde dehydrogenase (E.C. 1.2.1.19)

arginine and proline metabolism [**rn00330**]

$\beta$ -alanine metabolism [**rn00410**]

---

feruloyl esterase (E.C. 3.1.1.73)

---

gamma-glutamyl-gamma-aminobutyrate

arginine and proline metabolism [**rn00330**]

hydrolase (E.C. 3.5.1.94)

---

$\gamma$ -chaconine

UDP-glucose glucotransferase St-SGT2

steroidal glycoalkaloid biosynthesis

**SGNU293662**, **SGNU283603**

*S. tuberosum*

---

(E.C. 2.4.1.-)

---

cinnamic acid

phenylalanine ammonia-lyase

phenylalanine metabolism [**rn00360**]

**SGN-U312619**, **SGN-U312620**,

*S. lycopersicum*

---

(E.C. 4.3.1.24)

nitrogen metabolism [**rn00910**]

**SGN-U312621**, **SGN-U333748**,

phenylpropanoid biosynthesis [**ko00940**]

**SGN-U333750**, **SGN-U312617**,

**SGN-U312618**, **SGN-U325698**,

**SGN-U330655**, **SGN-U333749**,

**SGN-U333751**, **SGN-U341447**,

*A. thaliana*

---

|                 |                                                                      |                                                                                                                                          |                                                                                                                                                                                                                                                                                                                                               |                      |
|-----------------|----------------------------------------------------------------------|------------------------------------------------------------------------------------------------------------------------------------------|-----------------------------------------------------------------------------------------------------------------------------------------------------------------------------------------------------------------------------------------------------------------------------------------------------------------------------------------------|----------------------|
|                 | phenylalanine/tyrosine ammonia-lyase;<br>PTAL (E.C. 4.3.1.25)        | phenylalanine metabolism [ <b>rn00360</b> ]<br>nitrogen metabolism [ <b>rn00910</b> ]<br>phenylpropanoid biosynthesis [ <b>ko00940</b> ] |                                                                                                                                                                                                                                                                                                                                               |                      |
|                 | 2-enoate reductase (E.C. 1.3.1.31)                                   | phenylalanine metabolism [ <b>rn00360</b> ]                                                                                              |                                                                                                                                                                                                                                                                                                                                               |                      |
|                 | cinnamoyl-CoA:phenyllactate CoA-<br>transferase (E.C. 2.8.3.17) FldA | tropane, piperidine and pyridine alkaloid<br>biosynthesis [ <b>rn00960</b> ]                                                             |                                                                                                                                                                                                                                                                                                                                               |                      |
| colneleic acid  | 9-divinyl ether synthase (St), St-StDES                              | <b>divinyl ether biosynthesis I (9-LOX)</b>                                                                                              | G-9759                                                                                                                                                                                                                                                                                                                                        | <i>S. tuberosum</i>  |
| colnelenic acid | 9-divinyl ether synthase (St), St-StDES                              | <b>divinyl ether biosynthesis I (9-LOX)</b>                                                                                              | G-9759                                                                                                                                                                                                                                                                                                                                        | <i>S. tuberosum</i>  |
| ferulic acid    | 4-coumarate--CoA ligase (E.C. 6.2.1.12)                              | phenylpropanoid biosynthesis [ <b>rn00940</b> ]                                                                                          | <b>SGNU269219, SGNU269220</b><br><b>SGNU269221, SGNU269458,</b><br><b>SGNU269459, SGNU271690,</b><br><b>SGNU273689, SGNU276387,</b><br><b>SGNU279444, SGNU281563,</b><br><b>SGNU281995, SGNU287264,</b><br><b>SGNU287264, SGNU287265,</b><br><b>SGNU287266, SGNU292841,</b><br><b>SGNU293253, SGNU294251</b><br><b>SGNU296205, SGNU297674</b> | <i>S. tuberosum</i>  |
|                 | caffeic acid 3-O-methyltransferase<br>(E.C. 2.1.1.68)                | phenylpropanoid biosynthesis [ <b>ko00940</b> ]                                                                                          | <b>1481.m00053, BE319602</b><br><b>BG646036, BI311272,</b><br><b>OMT1, TC100776,</b><br><b>TC100776, TC102340,</b><br><b>TC98964</b>                                                                                                                                                                                                          | <i>M. truncatula</i> |
|                 | feruloyl esterase (E.C. 3.1.1.73)                                    | phenylpropanoid biosynthesis [ <b>ko00940</b> ]                                                                                          |                                                                                                                                                                                                                                                                                                                                               |                      |
|                 | deacylase (E.C. 3.5.1.71)                                            | phenylpropanoid biosynthesis [ <b>ko00940</b> ]                                                                                          |                                                                                                                                                                                                                                                                                                                                               |                      |
|                 | caffeic acid 3-O-methyltransferase<br>(E.C. 2.1.1.68)                | phenylpropanoid biosynthesis<br>[ <b>rn00940</b> ]/Suberin biosynthesis                                                                  | <b>1481.m00053</b><br><b>BE319602</b><br><b>BG646036</b><br><b>BI311272</b>                                                                                                                                                                                                                                                                   | <i>M. truncatula</i> |

TC100776

TC102340

TC98964

OMT1

*A. thaliana*

N-feruloylglycine deacylase

(E.C. 3.5.1.71)

coniferyl-aldehyde dehydrogenase

phenylpropanoid biosynthesis [rn00940]

(E.C. 1.2.1.68)

trans-feruloyl-CoA synthase

(E.C. 6.2.1.34)

feruloyl esterase (E.C. 3.1.1.73)

ferulate-5-hydroxylase (E.C. 1.14.-.-)

sinapate 1-glucosyltransferase

AT3G21560, AT4G15480,

*A. thaliana*

(E.C. 2.4.1.120)

AT4G15490, AT4G15500,

SGT1

*B. napus**R. sativus*

hydroxycinnamate 4-beta-

glucosyltransferase (E.C. 2.4.1.126)

feruloyltyramine

tyramine N-feruloyltransferase

suberin biosynthesis

SGNU269846, SGNU269847,

*S. tuberosum*

(E.C. 2.3.1.110)

SGNU283523, SGNU287587,

SGNU287588

fumaric acid

**fumarate hydratase** (E.C. 4.2.1.2)

phenylalanine degradation I Citrate cycle

SGNU273248

*S. tuberosum*

(TCA cycle) [ko00020]

**fumarylacetoacetase** (E.C. 3.7.1.2)

phenylalanine degradation I

SGNU290011, SGNU290010,

*S. tuberosum*

SGNU290009, SGNU278057,

SGNU271822

**succinate dehydrogenase** (E.C. 1.3.99.1)

citrate cycle (TCA cycle) [ko00020],

butanoate metabolism [rn00650], reductive

carboxylate cycle (CO<sub>2</sub> fixation) [rn00720],

benzoate degradation via CoA ligation

[rn00632]

fumarate reductase (NADH)

(E.C. 1.3.1.6)

|                                                                    |                                                                                                        |                                                                           |                                                                                                                                                                                                                          |
|--------------------------------------------------------------------|--------------------------------------------------------------------------------------------------------|---------------------------------------------------------------------------|--------------------------------------------------------------------------------------------------------------------------------------------------------------------------------------------------------------------------|
| aspartate ammonia-lyase (E.C. 4.3.1.1)                             | alanine, aspartate and glutamate metabolism<br>[rn00250], nitrogen metabolism [rn00910]                | <b>SGNU269166, SGNU274897</b>                                             | <i>S. tuberosum</i>                                                                                                                                                                                                      |
| glutamin-(asparagin)-ase (E.C. 3.5.1.38)                           |                                                                                                        |                                                                           |                                                                                                                                                                                                                          |
| adenylosuccinate lyase (E.C. 4.3.2.2)                              | purine metabolism [rn00230]<br>alanine, aspartate and glutamate metabolism<br>[rn00250]                | <b>SGNU284950, SGNU290676</b>                                             | <i>S. tuberosum</i>                                                                                                                                                                                                      |
| acylpyruvate hydrolase (E.C. 3.7.1.5)                              | tyrosine metabolism [rn00350]                                                                          |                                                                           |                                                                                                                                                                                                                          |
| argininosuccinate lyase (E.C. 4.3.2.1)                             | alanine, aspartate and glutamate metabolism<br>[rn00250], arginine and proline metabolism<br>[rn00330] | <b>SGNU280046, SGNU280873</b>                                             | <i>S. tuberosum</i>                                                                                                                                                                                                      |
| maleate isomerase (E.C. 5.2.1.1)                                   | butanoate metabolism [rn00650], nicotinate<br>and nicotinamide metabolism [rn00760]                    |                                                                           |                                                                                                                                                                                                                          |
| carboxymethyloxysuccinate lyase<br>(E.C. 4.2.99.12)                |                                                                                                        |                                                                           |                                                                                                                                                                                                                          |
| fumarylacetoacetase (E.C. 3.7.1.2)                                 | tyrosine metabolism [rn00350],<br>styrene degradation [rn00643]                                        | <b>SGNU271822, SGNU278057,<br/>SGNU290009, SGNU290010,<br/>SGNU290011</b> | <i>S. tuberosum</i>                                                                                                                                                                                                      |
| fumaric acid                                                       | succinate dehydrogenase (E.C. 1.3.5.1)                                                                 | citrate cycle (TCA cycle) [rn00020]                                       | <b>AT2G18450, AT3G27380,<br/>AT5G65165<br/>BQ138479<br/>JGI-219180, JGI-593943<br/>LOC_Os07g04240.1,<br/>LOC_Os09g20440.1</b><br><i>A. thaliana</i><br><i>M. truncatula</i><br><i>P. trichocarpa</i><br><i>O. sativa</i> |
| adenylosuccinate lyase (E.C. 4.3.2.2)                              | purine metabolism [rn00230]                                                                            | <b>SGNU284950, SGNU290676</b>                                             | <i>S. tuberosum</i>                                                                                                                                                                                                      |
| benzylsuccinate synthase<br>(E.C. 4.1.99.11)                       | benzoate degradation via CoA ligation<br>[rn00632]                                                     |                                                                           |                                                                                                                                                                                                                          |
| 2-hydroxy-6-ketono-2,4-dienedioic acid<br>hydrolase (E.C. 3.7.1.-) | phenylalanine metabolism [rn00360]                                                                     |                                                                           |                                                                                                                                                                                                                          |
| lyases (E.C. 4.1.99.-)                                             | 1- and 2-Methylnaphthalene degradation                                                                 |                                                                           |                                                                                                                                                                                                                          |

|                   |                                                               |                                                                                                                                                                          |                                                   |                                             |
|-------------------|---------------------------------------------------------------|--------------------------------------------------------------------------------------------------------------------------------------------------------------------------|---------------------------------------------------|---------------------------------------------|
|                   |                                                               | <b>[rn00624]</b>                                                                                                                                                         |                                                   |                                             |
| D-galactaric acid | uronate dehydrogenase (E.C. 1.1.1.203)                        | ascorbate and aldarate metabolism                                                                                                                                        |                                                   |                                             |
|                   | galactarate dehydratase (E.C. 4.2.1.42)                       | <b>[ko00053]</b>                                                                                                                                                         |                                                   |                                             |
| gluconic acid     | gluconolactonase (E.C. 3.1.1.17.)                             | pentose phosphate pathway                                                                                                                                                |                                                   |                                             |
|                   |                                                               | <b>[ko00030]</b>                                                                                                                                                         |                                                   |                                             |
|                   | gluconate 2-dehydrogenase<br>(E.C. 1.1.1.215.)                |                                                                                                                                                                          |                                                   |                                             |
| glyceric acid     | glycerate dehydrogenase<br>(E.C. 1.1.1.29)                    | glycine, serine and threonine metabolism<br><b>[rn00260]</b>                                                                                                             | <b>SGNU272307, SGNU288419</b>                     | <i>S. tuberosum</i>                         |
|                   |                                                               | glyoxylate and dicarboxylate metabolism<br><b>[rn00630]</b>                                                                                                              |                                                   |                                             |
|                   | hydroxypyruvate reductase<br>(E.C. 1.1.1.81)                  |                                                                                                                                                                          | <b>SGNU283355, SGNU286066</b>                     | <i>S. tuberosum</i>                         |
|                   | glyoxylate/hydroxypyruvate reductase A<br>(E.C. 1.1.1.79)     |                                                                                                                                                                          |                                                   |                                             |
|                   | glyoxylate reductase (E.C. 1.1.1.26)                          |                                                                                                                                                                          |                                                   |                                             |
|                   | glyoxylate reductase (NADP+)<br>(E.C. 1.1.1.79)               |                                                                                                                                                                          |                                                   |                                             |
|                   | 3-phosphoglycerate phosphatase<br>(E.C. 3.1.3.38)             | glycine, serine and threonine metabolism<br><b>[rn00260]</b>                                                                                                             |                                                   |                                             |
|                   | glycerate kinase (E.C. 2.7.1.31)                              | glycine, serine and threonine metabolism<br><b>[rn00260]</b> , glycerolipid metabolism<br><b>[rn00561]</b> , glyoxylate and dicarboxylate<br>metabolism <b>[rn00630]</b> | <b>AT1G80380</b><br><b>JGI-415047, JGI-829520</b> | <i>A. thaliana</i><br><i>P. trichocarpa</i> |
|                   | 2-hydroxy-3-oxopropionate reductase (E.C. 1.1.1.60)           | glyoxylate and dicarboxylate metabolism<br><b>[rn00630]</b>                                                                                                              | <b>SGNU278460, SGNU285986</b>                     | <i>S. tuberosum</i>                         |
|                   | phosphoglycerate phosphatase<br>(E.C. 3.1.3.20)               |                                                                                                                                                                          |                                                   |                                             |
|                   | oxaloglycolate reductase (decarboxylating)<br>(E.C. 1.1.1.92) | glyoxylate and dicarboxylate metabolism<br><b>[rn00630]</b>                                                                                                              |                                                   |                                             |
|                   | tartrate decarboxylase (E.C. 4.1.1.73)                        |                                                                                                                                                                          |                                                   |                                             |

|               |                                                   |                                    |                                                                                                                                                                                          |                     |
|---------------|---------------------------------------------------|------------------------------------|------------------------------------------------------------------------------------------------------------------------------------------------------------------------------------------|---------------------|
|               | aldehyde dehydrogenase (NAD+)<br>(E.C. 1.2.1.3)   | glycerolipid metabolism [rn00561]  | SGNU270085                                                                                                                                                                               | <i>S. tuberosum</i> |
|               | kinases (E.C. 2.7.1.-)                            |                                    | SGNU271185, SGNU274832,<br>SGNU276713, SGNU276826,<br>SGNU277635, SGNU277961,<br>SGNU281005, SGNU281971,<br>SGNU282732, SGNU284158,<br>SGNU286178, SGNU288877,<br>SGNU292150, SGNU295240 | <i>S. tuberosum</i> |
| linoleic acid | lipoxygenase (E.C. 1.13.11.12)                    | linoleic acid metabolism [rn00591] | SGNU268108, SGNU268109,<br>SGNU268110, SGNU269397,<br>SGNU275813, SGNU283623,<br>SGNU285664, SGNU286657,<br>SGNU286658, SGNU286659,<br>SGNU291453, SGNU294974,<br>SGNU296125             | <i>S. tuberosum</i> |
|               | arachidonate 15-lipoxygenase<br>(E.C. 1.13.11.33) |                                    |                                                                                                                                                                                          |                     |
|               | linoleate isomerase (E.C. 5.2.1.5)                |                                    |                                                                                                                                                                                          |                     |
|               | linoleate 11-lipoxygenase<br>(E.C. 1.13.11.45)    |                                    |                                                                                                                                                                                          |                     |
|               | cytochrome P450 1.14.14.1)                        |                                    | SGNU276200, SGNU291486                                                                                                                                                                   | <i>S. tuberosum</i> |
|               | arachidonate 5-lipoxygenase<br>(E.C. 1.13.11.34)  |                                    |                                                                                                                                                                                          |                     |
|               | linoleate (8R)-dioxygenase<br>(E.C. 1.13.11.44)   |                                    |                                                                                                                                                                                          |                     |
|               | linoleoyl-CoA desaturase<br>(E.C. 1.14.19.3)      |                                    |                                                                                                                                                                                          |                     |
|               | phospholipase A (E.C. 3.1.1.4)                    |                                    | SGNU278771, GNU278772,<br>SGNU278773, SGNU278774,<br>SGNU278776, SGNU278777,                                                                                                             | <i>S. tuberosum</i> |

SGNU278781, SGNU283241,

SGNU283241, SGNU289839,

SGNU289846

|                                                                  |                                                                           |                                                                                                                                 |                                                                                         |                       |
|------------------------------------------------------------------|---------------------------------------------------------------------------|---------------------------------------------------------------------------------------------------------------------------------|-----------------------------------------------------------------------------------------|-----------------------|
|                                                                  | palmitoyl-CoA hydrolase (E.C. 3.1.2.2)                                    |                                                                                                                                 | <b>JGI-663966, JGI-675790</b>                                                           | <i>P. trichocarpa</i> |
| oxalic acid                                                      | <b>oxalate oxidase</b> (E.C. 1.2.3.4)                                     | glyoxylate and dicarboxylate metabolism<br>[ko00630]                                                                            |                                                                                         |                       |
|                                                                  | oxaloacetase (E.C. 3.7.1.1)                                               |                                                                                                                                 |                                                                                         |                       |
|                                                                  | glyoxylate oxidase (E.C. 1.2.3.5)                                         |                                                                                                                                 |                                                                                         |                       |
|                                                                  | oxalate decarboxylase (E.C. 4.1.1.2)                                      |                                                                                                                                 |                                                                                         |                       |
|                                                                  | ascorbate 2,3-dioxygenase<br>(E.C. 1.13.11.13)                            |                                                                                                                                 |                                                                                         |                       |
|                                                                  | oxalyl coenzyme A synthetase<br>(E.C. 6.2.1.8)                            |                                                                                                                                 |                                                                                         |                       |
|                                                                  | oxalate coenzyme A-transferase<br>(E.C. 2.8.3.2)                          |                                                                                                                                 |                                                                                         |                       |
|                                                                  | formyl-CoA transferase (E.C. 2.8.3.16)                                    |                                                                                                                                 |                                                                                         |                       |
| pipecolic acid                                                   | saccharopine dehydrogenase (NAD+, L-<br>glutamate forming) (E.C. 1.5.1.9) | tropane, piperidine and pyridine alkaloid<br>biosynthesis [rn00960]                                                             | <b>JGI-739274, JGI-739281</b>                                                           | <i>P. trichocarpa</i> |
|                                                                  | saccharopine dehydrogenase (NAD+, L-<br>lysine forming) (E.C. 1.5.1.7)    |                                                                                                                                 |                                                                                         |                       |
|                                                                  | lysine 6-dehydrogenase (E.C. 1.4.1.18)                                    |                                                                                                                                 |                                                                                         |                       |
| pyroglutamic acid                                                | aminoacyltransferase (E.C. 2.3.2.-)                                       | glutathione metabolism [rn00480], butirosin<br>and neomycin biosynthesis [rn00524]                                              | <b>SGNU278180, SGNU279602,<br/>SGNU293093</b>                                           | <i>S. tuberosum</i>   |
| sesquiterpenoid<br>phytoalexins                                  | vetispiradiene synthase, VS1<br>(E.C. 4.2.3.21)                           | biosynthesis of alkaloids derived from<br>terpenoid and polyketide<br>[map01066]/sesquiterpenoid phytoalexins<br>biosynthesis   | <b>VS1</b>                                                                              | <i>H. muticus</i>     |
| sesquiterpenoid<br>phytoalexins &<br>steroidal<br>glycoalkaloids | 3-hydroxy-3-methylglutaryl-CoA reductase,<br>HMG1 (E.C. 1.1.1.34)         | terpenoid backbone biosynthesis<br>[map00900], biosynthesis of alkaloids<br>derived from terpenoid and polyketide<br>[map01066] | <b>AW687494, BE124699,<br/>BG644380, BQ140041,<br/>CB892390, TC102857,<br/>TC106632</b> | <i>M. truncatula</i>  |



|                                               |                                                                    |                                                                                                                  |                                                                                                                                                                                                                    |                       |
|-----------------------------------------------|--------------------------------------------------------------------|------------------------------------------------------------------------------------------------------------------|--------------------------------------------------------------------------------------------------------------------------------------------------------------------------------------------------------------------|-----------------------|
|                                               |                                                                    |                                                                                                                  | HMG1                                                                                                                                                                                                               | <i>A. thaliana</i>    |
|                                               |                                                                    |                                                                                                                  | JGI-595031, JGI-798252,                                                                                                                                                                                            | <i>P. trichocarpa</i> |
|                                               |                                                                    |                                                                                                                  | JGI-820962, JGI-829982,                                                                                                                                                                                            |                       |
|                                               |                                                                    |                                                                                                                  | JGI-831722, JGI-834149                                                                                                                                                                                             |                       |
|                                               |                                                                    |                                                                                                                  | LOC_Os01g31610.1,                                                                                                                                                                                                  | <i>O. sativa</i>      |
|                                               |                                                                    |                                                                                                                  | LOC_Os01g34270.1,                                                                                                                                                                                                  |                       |
|                                               |                                                                    |                                                                                                                  | LOC_Os02g48330.1,                                                                                                                                                                                                  |                       |
|                                               |                                                                    |                                                                                                                  | LOC_Os03g38870.1,                                                                                                                                                                                                  |                       |
|                                               |                                                                    |                                                                                                                  | LOC_Os05g02990.1,                                                                                                                                                                                                  |                       |
|                                               |                                                                    |                                                                                                                  | LOC_Os05g38960.1,                                                                                                                                                                                                  |                       |
|                                               |                                                                    |                                                                                                                  | LOC_Os08g40180.1,                                                                                                                                                                                                  |                       |
|                                               |                                                                    |                                                                                                                  | LOC_Os09g31970.1                                                                                                                                                                                                   |                       |
| sesquiterpenoid                               | 1-deoxy-D-xylulose-5-phosphate                                     | terpenoid backbone biosynthesis [ko00900],                                                                       | SGNU270961, SGNU270962,                                                                                                                                                                                            | <i>S. tuberosum</i>   |
| phytoalexins &<br>steroidal<br>glycoalkaloids | reductoisomerase, dxr (E.C. 1.1.1.267)                             | biosynthesis of alkaloids derived from<br>terpenoid and polyketide [map01066]                                    | SGNU270963                                                                                                                                                                                                         |                       |
| sesquiterpenoid                               | farnesyl diphosphate synthase, ispA                                | terpenoid backbone biosynthesis [ko00900],                                                                       | SGNU269148, SGNU269149,                                                                                                                                                                                            | <i>S. tuberosum</i>   |
| phytoalexins &<br>steroidal<br>glycoalkaloids | (E.C. 2.5.1.1 2.5.1.10)                                            | biosynthesis of alkaloids derived from<br>terpenoid and polyketide [map01066]                                    | SGNU287228, SGNU287229                                                                                                                                                                                             |                       |
| $\gamma$ -solanine                            | UDP-galactose galactosyltransferase St-<br>SGT1 (E.C. 2.4.1.-)     | biosynthesis of alkaloids derived from<br>terpenoid and polyketide [map01066]                                    | SGNU269176, SGNU270492,<br>SGNU270493, SGNU275270,<br>SGNU275759, SGNU277244,<br>SGNU278383, SGNU279601,<br>SGNU280444, SGNU283603,<br>SGNU287245, SGNU289954,<br>SGNU290507, SGNU293303<br>SGNU293662, SGNU298857 | <i>S. tuberosum</i>   |
| steroidal<br>glycoalkaloids                   | farnesyl-diphosphate farnesyltransferase,<br>FDFT1 (E.C. 2.5.1.21) | steroid biosynthesis [ko00100], biosynthesis<br>of alkaloids derived from terpenoid and<br>polyketide [map01066] | SGNU270583, SGNU287853                                                                                                                                                                                             | <i>S. tuberosum</i>   |

|                                                                             |                                                               |                                                                                                                                                                                                                                                                                        |                                                                                                                                                            |                                                                                         |
|-----------------------------------------------------------------------------|---------------------------------------------------------------|----------------------------------------------------------------------------------------------------------------------------------------------------------------------------------------------------------------------------------------------------------------------------------------|------------------------------------------------------------------------------------------------------------------------------------------------------------|-----------------------------------------------------------------------------------------|
| steroidal                                                                   | squalene monooxygenase, SQLE (E.C.                            | steroid biosynthesis [ <b>ko00100</b> ],                                                                                                                                                                                                                                               | <b>SGNU291972, SGNU269909</b>                                                                                                                              | <i>S. tuberosum</i>                                                                     |
| glycoalkaloids                                                              | 1.14.99.7)                                                    | biosynthesis of alkaloids derived from<br>terpenoid and polyketide [ <b>map01066</b> ]                                                                                                                                                                                                 |                                                                                                                                                            |                                                                                         |
| succinic acid                                                               | succinyl-CoA synthetase alpha subunit,<br>LSC1 (E.C. 6.2.1.5) | citrate cycle (TCA cycle) [ <b>ko00020</b> ],<br>propanoate metabolism [ <b>ko00640</b> ],<br>C5-branched dibasic acid metabolism<br>[ <b>ko00660</b> ], reductive carboxylate cycle (CO <sub>2</sub><br>fixation) [ <b>ko00720</b> ]                                                  | <b>SGNU268134, SGNU270065,</b><br><b>SGNU287678, SGNU287677,</b><br><b>SGNU270066</b>                                                                      | <i>S. tuberosum</i>                                                                     |
| succinate dehydrogenase (ubiquinone)<br>flavoprotein subunit (E.C. 1.3.5.1) | flavoprotein                                                  | citrate cycle (TCA cycle) [ <b>ko00020</b> ],<br>oxidative phosphorylation [ <b>ko00190</b> ]                                                                                                                                                                                          | <b>AT2G18450, AT3G27380,</b><br><b>AT5G65165</b><br><b>BQ138479</b><br><b>JGI-219180, JGI-593943</b><br><b>LOC_Os07g04240.1</b><br><b>LOC_Os09g20440.1</b> | <i>A. thaliana</i><br><i>M. truncatula</i><br><i>P. trichocarpa</i><br><i>O. sativa</i> |
| succinate dehydrogenase<br>subunit, sdhA (E.C. 1.3.99.1)                    | flavoprotein                                                  | citrate cycle (TCA cycle) [ <b>ko00020</b> ],<br>oxidative phosphorylation [ <b>ko00190</b> ]<br>benzoate degradation via CoA ligation<br>[ <b>ko00632</b> ], butanoate metabolism<br>[ <b>ko00650</b> ], reductive carboxylate cycle (CO <sub>2</sub><br>fixation) [ <b>ko00720</b> ] |                                                                                                                                                            |                                                                                         |
| succinyl-CoA synthetase alpha subunit,<br>LSC1 (E.C. 6.2.1.4 6.2.1.5)       | flavoprotein                                                  | citrate cycle (TCA cycle) [ <b>ko00020</b> ],<br>propanoate metabolism [ <b>ko00640</b> ]                                                                                                                                                                                              | <b>SGNU283178, SGNU-268134,</b><br><b>SGNU270065, SGNU287678,</b><br><b>SGNU-287677, SGNU-270066</b>                                                       | <i>S. tuberosum</i>                                                                     |

<sup>a</sup> *A. thaliana*; *Arabidopsis thaliana* (Arabidopsis), *B. napus*; *Brassica napus* (rapeseed), *H. muticus*; *Hyoscyamus muticus* (henbane), *M. truncatula*; *Medicago truncatula* (barrel clover), *O. sativa*; *Oryza sativa* (rice), *P. trichocarpa*; *Populus trichocarpa* (black cottonwood), *R. sativus*; *Raphanus sativus* (radish), *S. lycopersicum*; *Solanum lycopersicum* (tomato), *S. tuberosum*; *Solanum tuberosum* (potato).
